# Supplementary material for: Association between sarcopenia and clinical outcomes in patients with hepatocellular carcinoma: an updated meta-analysis
Source: Springer Nature journal article supplement (doi:10.1038/s41598-022-27238-z), 2023-01-17
Supplement: MOESM2 [file 41598_2022_27238_MOESM2_ESM.pdf]

Supplementary Figure 1 The prevalence of sarcopenia

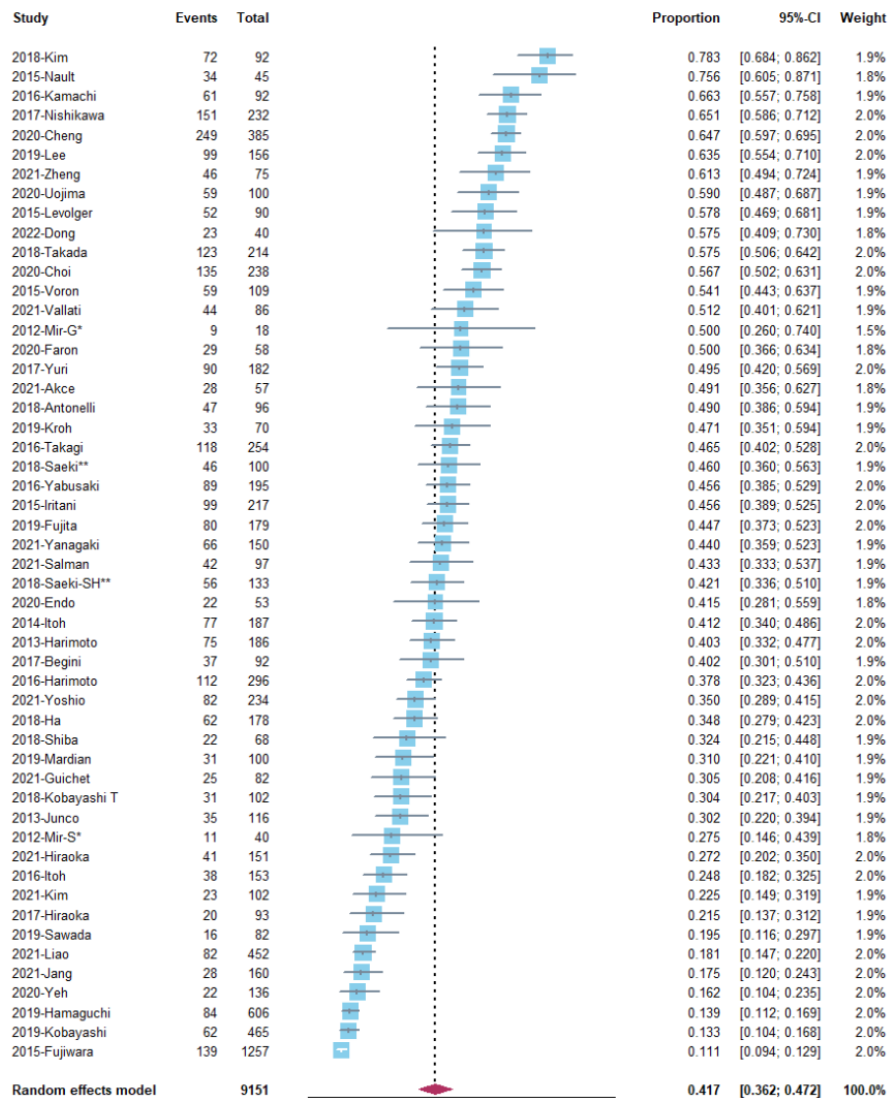

Supplementary Figure 2 The Baujat plot of overall survival

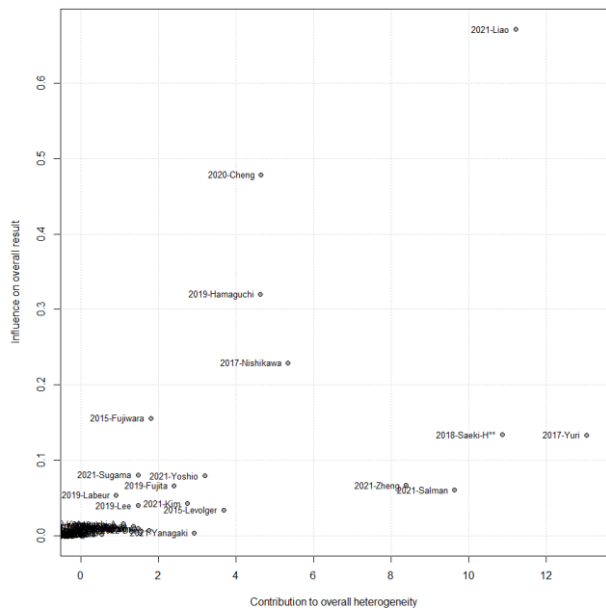

### Supplementary Figure 3 The sensitivity analysis of overall survival

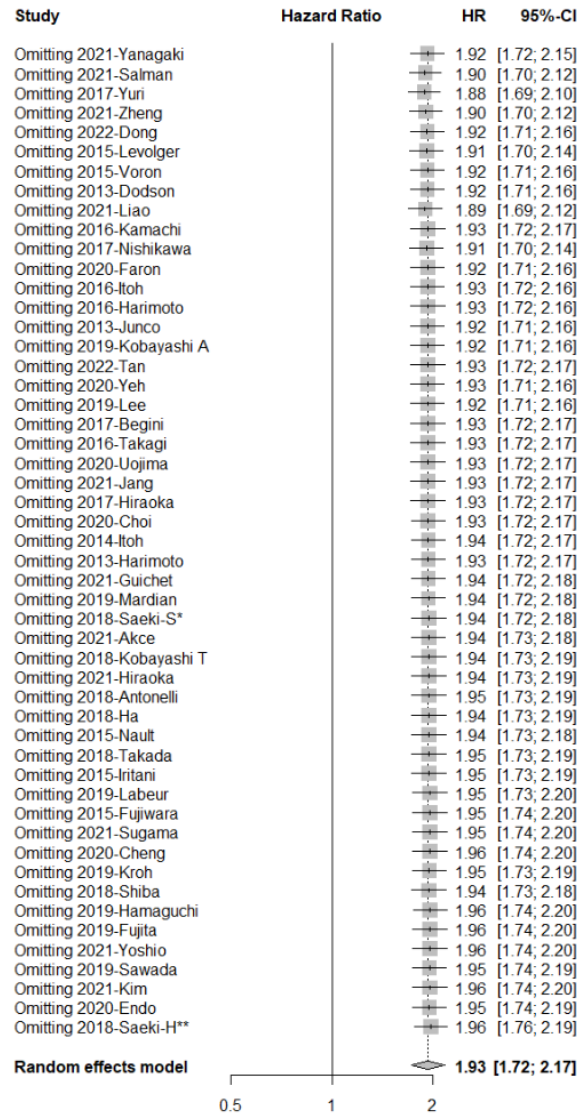

### Supplementary Figure 4 The forest plot of recurrence

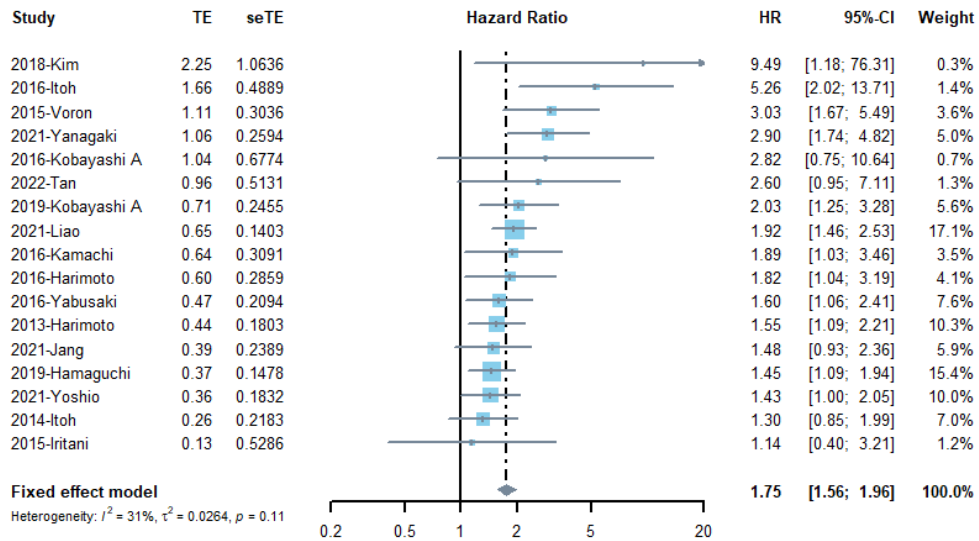

### Supplementary Figure 5 The sensitivity analysis of recurrence

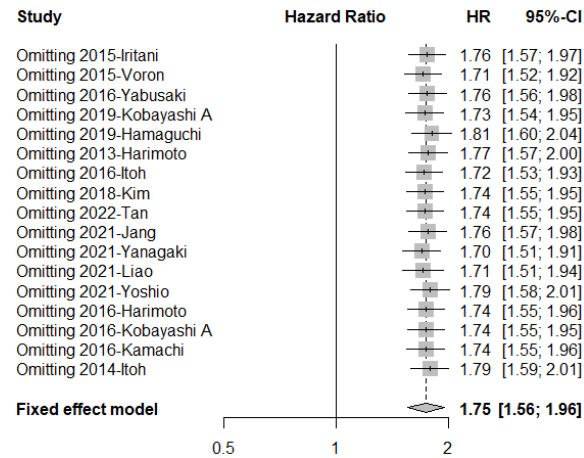

### Supplementary Figure 6 The forest plot of progression-free survival

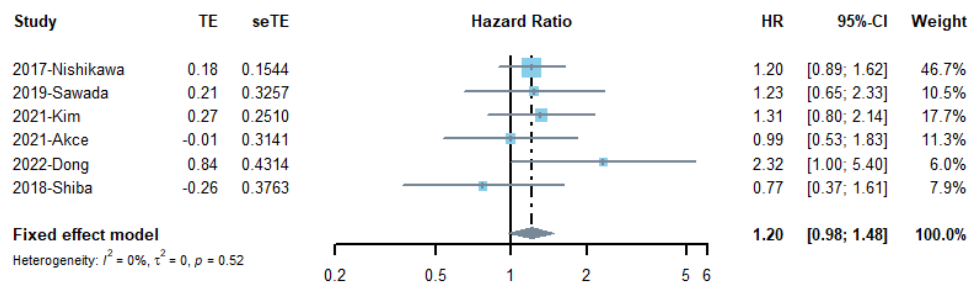

### Supplementary Figure 7 The forest plot of objective response rate

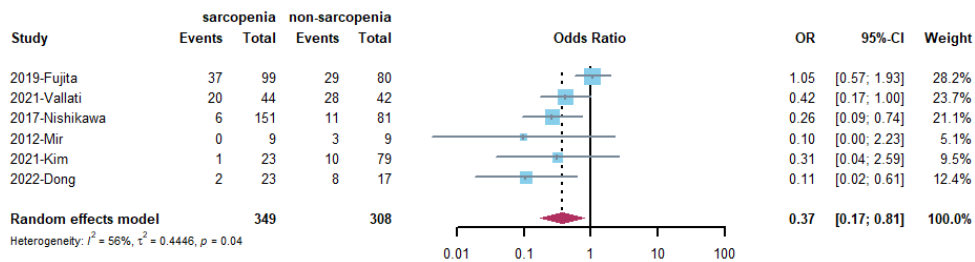

### Supplementary Figure 8 The sensitivity analysis of objective response rate

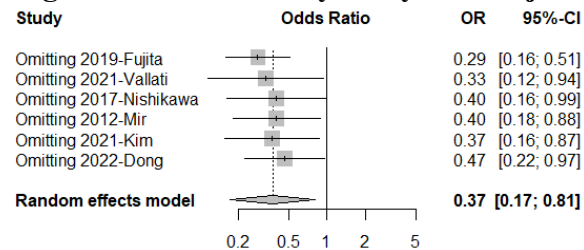

**Supplementary Figure 9 The forest plot of disease control rate**

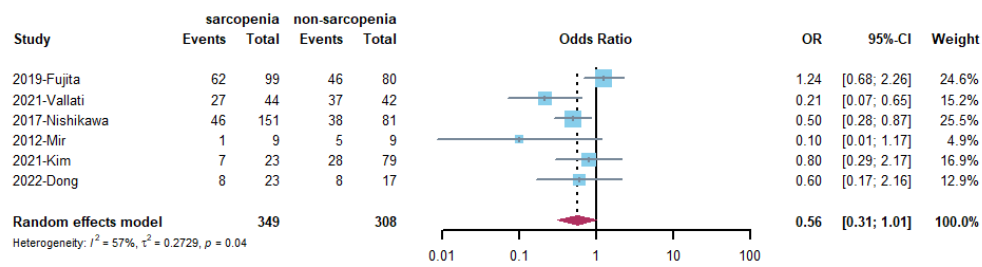

**Supplementary Figure 10 The Baujat plot of disease control rate**

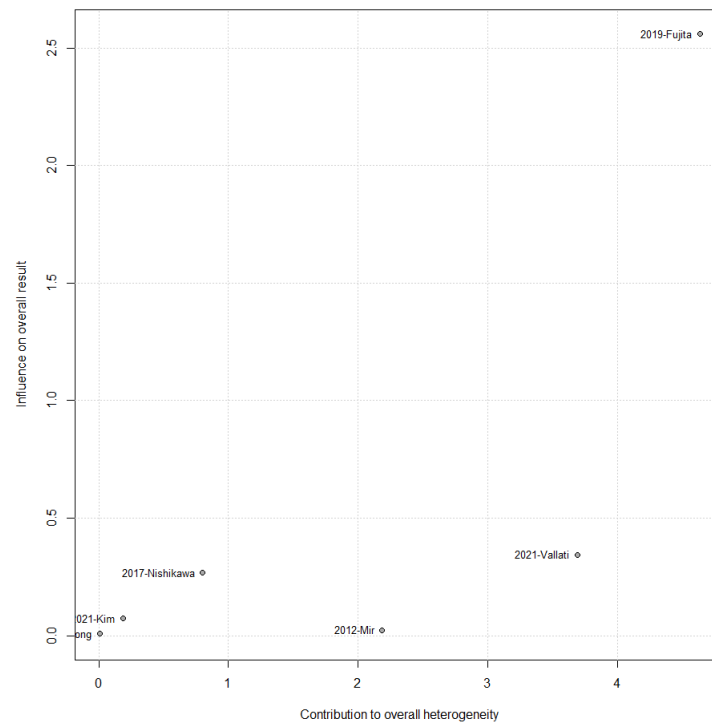

**Supplementary Figure 11 The forest plot of disease control rate after omitting the study by Fujita *et al.***

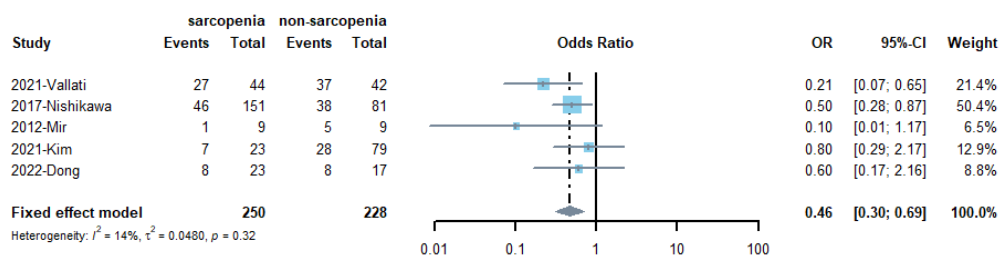

**Supplementary Figure 12 The forest plot of severe postoperative complications**

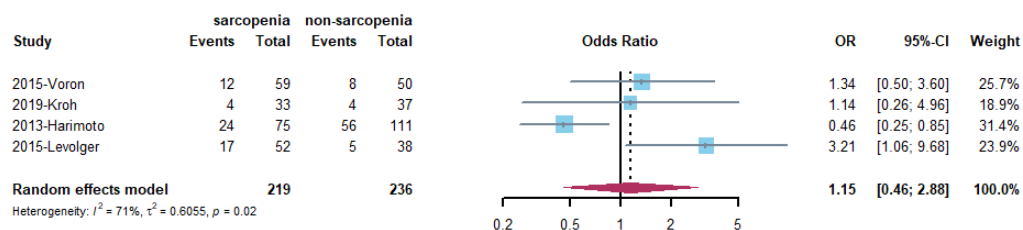

Supplementary Figure 13 The sensitivity analysis of severe postoperative complications

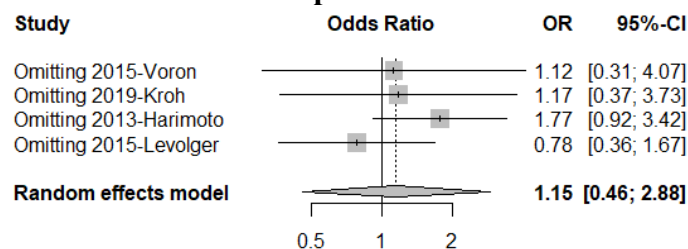

Supplementary Figure 14 The sensitivity analysis of severe postoperative complications on hepatectomy (after omitting the study by Levolger *et al.*)

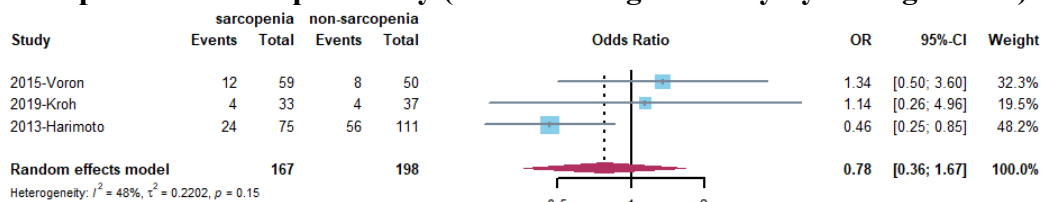

Supplementary Figure 15 The forest plot of severe drug-related adverse events

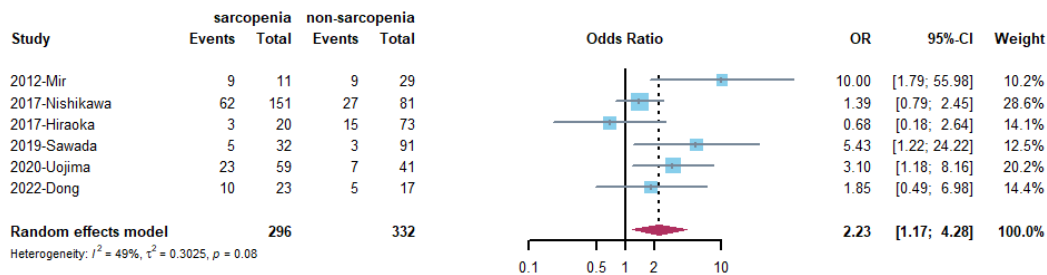

Supplementary Figure 16 The Baujat plot of severe drug-related adverse events

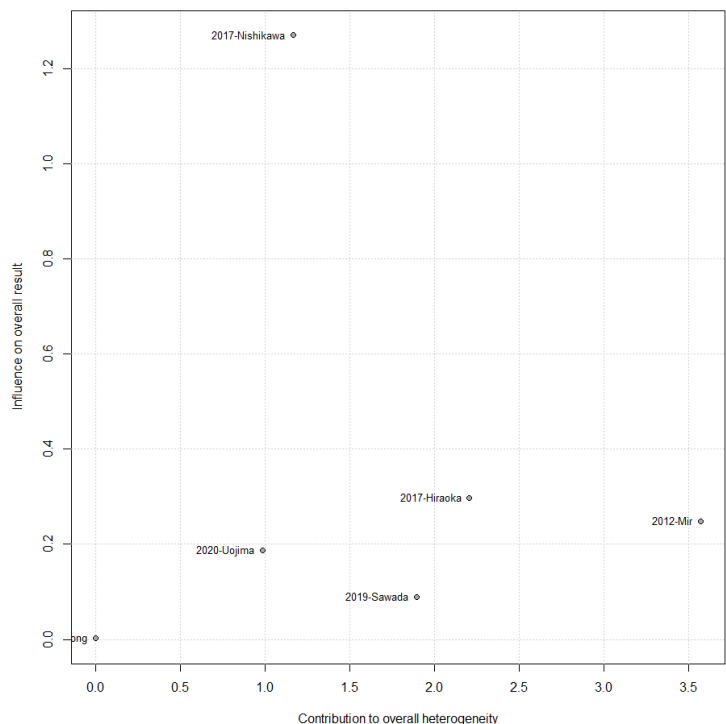

## Supplementary Figure 17 The sensitivity analysis of severe drug-related adverse events

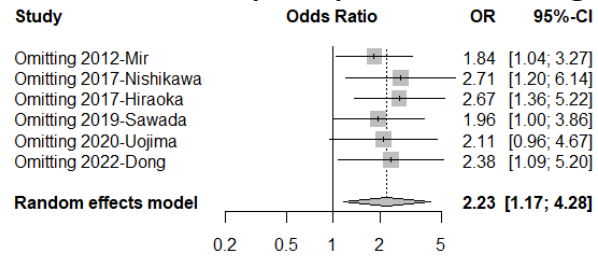

## Supplementary Figure 18 Funnel plots of OS (A), recurrence (B), PFS (C), DCR (D), ORR (E), severe drug-related adverse events (F)

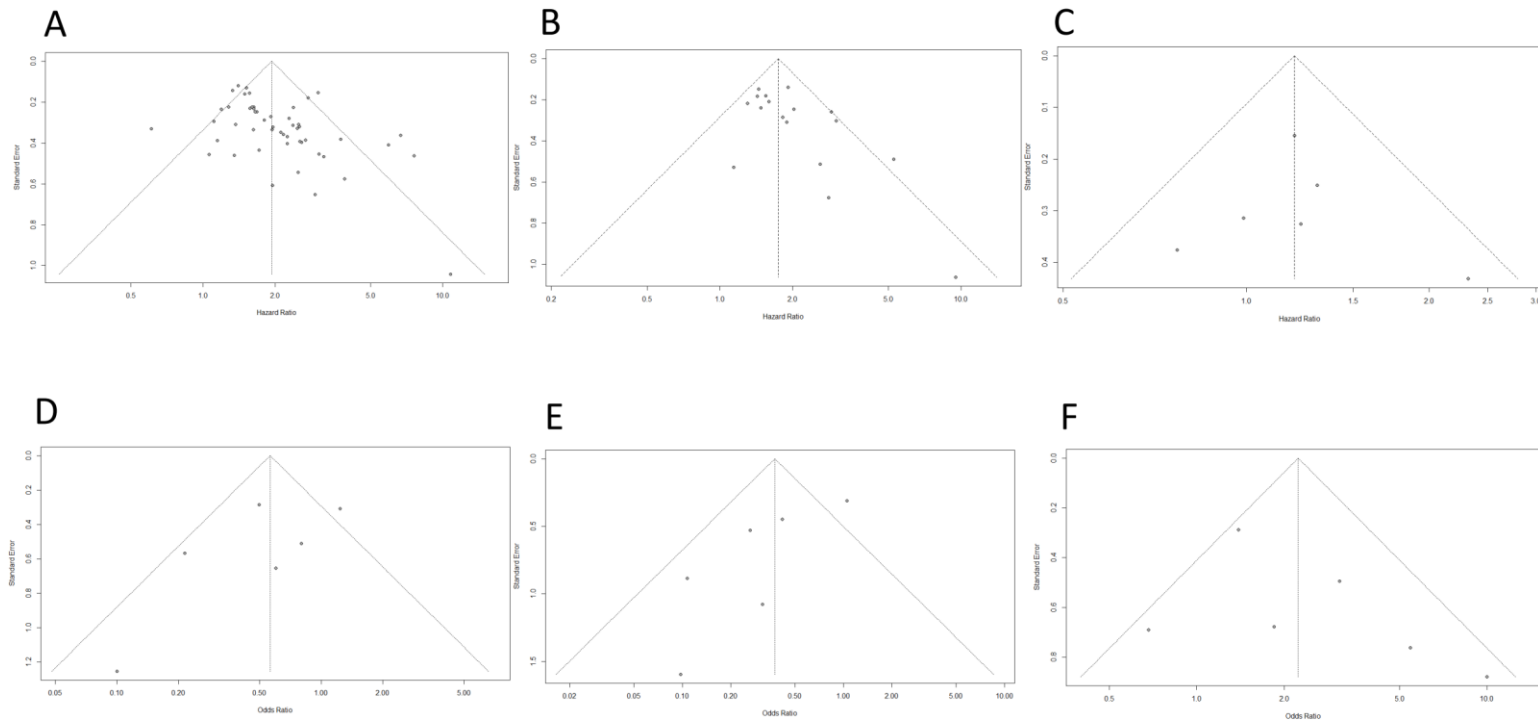

**Supplementary Figure 19 The Trim and Fill method: OS**

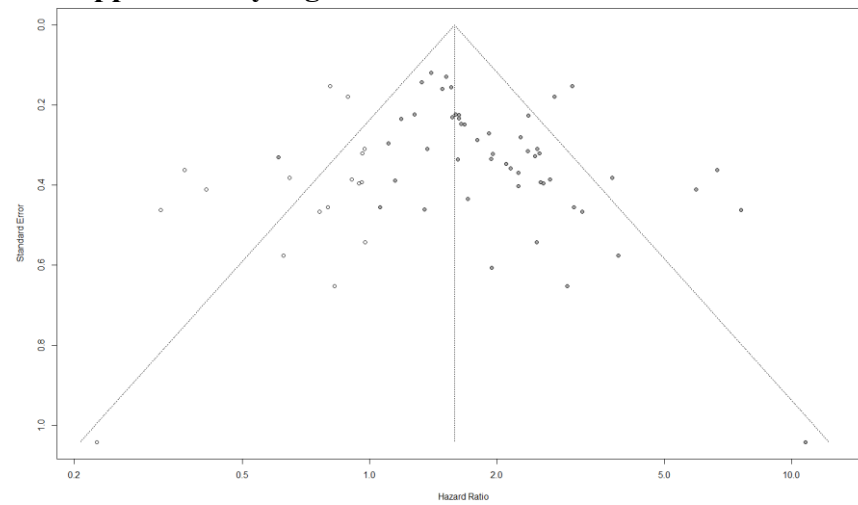

**Supplementary Figure 20 The Trim and Fill method: recurrence**

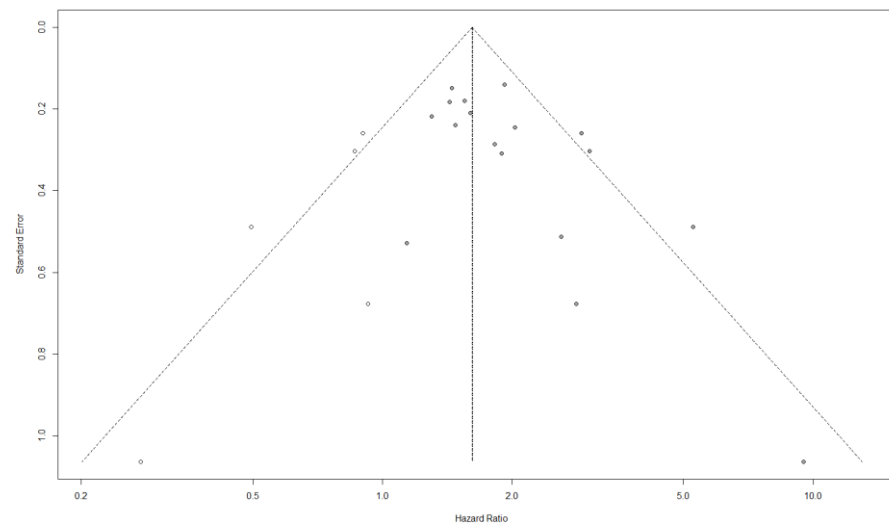

**Supplementary Table 1 The characteristics of included studies**

| <b>Year</b> | <b>Author</b>     | <b>Region</b> | <b>Treatment</b>                           | <b>Diagnostic method</b> | <b>Cut-off value</b>                                  | <b>Stage of HCC</b>              | <b>Outcome</b>                      | <b>number of patients (number of sarcopenia)</b> | <b>Gender (male/female)</b> | <b>Newcastle – Ottawa scale</b> |
|-------------|-------------------|---------------|--------------------------------------------|--------------------------|-------------------------------------------------------|----------------------------------|-------------------------------------|--------------------------------------------------|-----------------------------|---------------------------------|
| 2012        | Olivier Mir       | France        | sorafenib                                  | SMI                      | Male:55.4;<br>Female:38.9                             | BCLC stage C                     | PFS, OS, toxicity                   | 40 (11)                                          | /                           | 7                               |
| 2012        | Olivier Mir       | France        | gemcitabine and oxaliplatin as second-line | SMI                      | Male:55.4;<br>Female:38.9                             | BCLC stage C                     | PFS, OS, , tumor response, toxicity | 18 (9)                                           | 15/3                        | 7                               |
| 2013        | Judith Meza-Junco | Canada        | TACE/TARE/ablation/Combined treatment/BSC  | SMI                      | Male, 43 for BMI < 25, 53 for BMI > 25;<br>Female, 41 | TMN (I/II/III/IV):<br>54/38/21/3 | OS                                  | 116 (35)                                         | 98/18                       | 7                               |

|      |                    |                 |                                            |     |                                                                                                  |                                       |                                            |            |         |   |
|------|--------------------|-----------------|--------------------------------------------|-----|--------------------------------------------------------------------------------------------------|---------------------------------------|--------------------------------------------|------------|---------|---|
| 2013 | N Harimoto         | Japan           | hepatectomy                                | SMI | Male:43.75;<br>Female:41.1                                                                       | TMN (I/II/III/IV):<br>29/95/49/13     | OS, DFS,<br>postoperative<br>complications | 186 (75)   | 145/41  | 8 |
| 2013 | Rebecca M Dodson   | USA             | TACE or TARE                               | TPA | Male: 477<br>mm <sup>2</sup> /m <sup>2</sup> ;<br>Female: 338<br>mm <sup>2</sup> /m <sup>2</sup> | BCLC stage B and C                    | OS                                         | 109        | /       | 7 |
| 2015 | Soichi Iritani     | Japan           | resection/RFA/<br>TACE or<br>TAI/radiation | FFM | 37                                                                                               | Stage<br>(I/II/III/IV):52/71/66/28    | OS, DFS                                    | 217 (99)   | 146/71  | 7 |
| 2014 | Shinji Itoh        | Japan           | Hepatic<br>Resection                       | SMI | Male:43.75;<br>Female:41.1                                                                       | /                                     | OS, RFS                                    | 190 (77)   | 146/44  | 7 |
| 2015 | Naoto Fujiwara     | Japan           | RFA and TACE                               | SMI | Male:36.2;<br>Female:29.6                                                                        | BCLC(0/A/B/C/D):<br>181/588/427/47/14 | OS                                         | 1257 (139) | 828/429 | 9 |
| 2015 | Thibault Voron     | France          | Hepatectomy                                | SMI | Male:52.4;<br>Female:38.9                                                                        | /                                     | OS, DFS,<br>postoperative<br>complications | 109 (59)   | 92/17   | 8 |
| 2015 | Stef Levolger      | The Netherlands | RFA                                        | SMI | Male:52.0;<br>Female:39.5                                                                        | BCLC (0/A/B/C):<br>15/30/36/9         | OS,<br>postoperative<br>complications      | 90 (52)    | 63/27   | 8 |
| 2015 | Jean-Charles Nault | France          | Sorafenib/<br>brivanib: 44/8               | SMI | Male:55;<br>Female:39                                                                            | BCLC stage B and C                    | OS                                         | 45 (34)    | /       | 7 |

|      |                    |       |                           |                                         |                                                                                          |                                           |         |           |        |   |
|------|--------------------|-------|---------------------------|-----------------------------------------|------------------------------------------------------------------------------------------|-------------------------------------------|---------|-----------|--------|---|
| 2016 | Norimitsu Yabusaki | Japan | hepatic resection         | SMI                                     | Male:43.75;<br>Female:41.1                                                               | TNM (I/II/III/IVA/IVB):<br>20/112/42/19/2 | RFS     | 195 (89)  | 157/38 | 7 |
| 2016 | Saori Kamachi      | Japan | surgical resection or RFA | SMI                                     | Male:52.4;<br>Female:38.5                                                                | BCLC (0/A/B):<br>29/47/16                 | OS, RFS | 92 (61)   | 65/27  | 8 |
| 2016 | Norifumi Harimoto  | Japan | hepatic resection         | SMI                                     | the actual skeletal muscle area was 85% smaller than the calculated skeletal muscle area | TNM (I/II/III/IV):<br>48/156/74/18        | OS, DFS | 296 (112) | 221/75 | 8 |
| 2016 | Atsushi Kobayashi  | Japan | hepatectomy               | Delta PMI                               | -0.160                                                                                   | TNM (I+II/III+IV):<br>69/43               | RFS     | 112       | 90/22  | 8 |
| 2016 | Kosei Takagi       | Japan | curative hepatectomy      | SMI                                     | Male:46.4;<br>Female:37.6                                                                | TNM (I/II/III/IV):<br>28/110/83/33        | OS      | 254 (118) | 207/47 | 7 |
| 2016 | Shinji Itoh        | Japan | LDLT                      | skeletal muscle mass-to-VFA ratio (SVR) | Lowest quartile                                                                          | BCLC stage A and B                        | OS, RFS | 153 (38)  | 86/67  | 7 |
| 2017 | Yukihisa Yuri      | Japan | RFA                       | PMI                                     | Male:6.31;<br>Female:3.91                                                                | BCLC stage A and B                        | OS      | 182 (90)  | 111/71 | 7 |
| 2017 | Paola              | Italy | Ablation,                 | SMI                                     | Male, 43 for BMI                                                                         | BCLC(A/B/C/D):38/23                       | OS      | 92 (37)   | 62/27  | 7 |

|      |                    |       |                                                                       |                   |                                   |                                        |                                   |                                  |                              |   |
|------|--------------------|-------|-----------------------------------------------------------------------|-------------------|-----------------------------------|----------------------------------------|-----------------------------------|----------------------------------|------------------------------|---|
|      | Begini             |       | TACE, hepatic resection, supportive care, orthotopic liver transplant |                   | < 25, 53 for BMI > 25; Female, 41 | /26/5                                  |                                   |                                  |                              |   |
| 2017 | Hiroki Nishikawa   | Japan | sorafenib                                                             | SMI               | Male:36.2; Female:29.6            | Stage (I/II/III/IVA/IVB):1/18/79/46/88 | OS, PFS, tumor response, toxicity | 232 (151)                        | 181/81                       | 8 |
| 2017 | Atsushi Hiraoka    | Japan | sorafenib                                                             | PSI               | Male:4.24; Female:2.5             | TNM(II/III/IVA/IVB): 10/28/11/44       | OS, toxicity                      | 93 (20)                          | 81/12                        | 7 |
| 2018 | Takamasa Kobayashi | Japan | TACE                                                                  | SMI and delta SMI | Male:42; Female:38                | TNM(I/II/III/IV): 11/22/46/23          | OS                                | 102 (31)                         | 70/32                        | 8 |
| 2018 | Young Ri Kim       | Korea | LDLT                                                                  | PM thickness      | 12 mm/m                           | beyond the Milan criteria              | RFS                               | 92 (72)                          | 62/30                        | 8 |
| 2018 | Hitomi Takada      | Japan | sorafenib                                                             | SMI               | Male:42; Female:38                | BCLC stage B and C                     | OS                                | 214 (123)                        | 166/48                       | 8 |
| 2018 | Issei Saeki        | Japan | sorafenib                                                             | SMI               | Male:42; Female:38                | Stage (II-III/IV): 30/70               | OS                                | 100 (46)                         | 72/28                        | 9 |
| 2018 | Issei Saeki*       | Japan | sorafenib and HAIC                                                    | SMI               | Male:42; Female:38                | BCLC stage C                           | OS, tumor response                | Sorafenib: 78 (32); HAIC:55 (24) | Sorafenib: 57/21 HAIC: 42/13 | 7 |
| 2018 | Yeonjun Ha         | Korea | /                                                                     | SMI               | Male:45.8; Female:43              | BCLC (0+A/B/C/D): 44/20/100/14         | OS                                | 178 (62)                         | 141/37                       | 8 |

|      |                   |                 |                                          |                   |                                                    |                                                                           |                    |          |         |   |
|------|-------------------|-----------------|------------------------------------------|-------------------|----------------------------------------------------|---------------------------------------------------------------------------|--------------------|----------|---------|---|
| 2018 | Giulio Antone lli | Italy           | sorafenib                                | SMI               | Male, 43 for BMI < 25, 53 for BMI > 25; Female, 41 | BCLC stage B and C                                                        | OS                 | 96 (47)  | 75/21   | 8 |
| 2018 | Shintaro Shiba    | Japan           | Carbon Ion Radiotherapy                  | SMI               | Male:43.75; Female:41.10                           | Stage (I/II/III):57/7/4                                                   | OS, PFS, toxicity  | 68 (22)  | 41/27   | 7 |
| 2019 | Koji Sawada       | Japan           | sorafenib                                | SMI               | Male:36.2; Female:29.6                             | BCLC(A/B/C): 8/35/39                                                      | OS, PFS, toxicity  | 82 (16)  | 67/15   | 8 |
| 2019 | Tim A Labeur      | The Netherlands | sorafenib                                | SMI               | Male, 43 for BMI < 25, 53 for BMI > 25; Female, 41 | BCLC stage B and C                                                        | OS, TTP            | 278      | 220/58  | 9 |
| 2019 | Masashi Fujita    | Japan           | TACE                                     | PMI and delta PMI | Male:6; Female:3.4                                 | TNM I/II/III/IVA/IVB 8/37/41/9/4(non-sarcopenia); 6/33/30/8/3(sarcopenia) | OS, tumor response | 179 (80) | 130/49  | 8 |
| 2019 | Atsushi Kobayashi | Japan           | Hepatectomy                              | SMI               | Male:40.31; Female:30.88                           | TNM(I/II/III/IV): 64/183/147/71                                           | OS, RFS            | 465 (62) | 367/98  | 9 |
| 2019 | Yuhei Hamaguchi   | Japan           | Hepatectomy                              | SMI               | Male:40.31; Female:30.88                           | TNM (I + II/ III + IV ): 361/245                                          | OS, RFS            | 606 (84) | 484/122 | 9 |
| 2019 | Yan Mardiana      | Indonesia       | TACE, sorafenib, or supportive Treatment | SMI               | Male:40.31; Female:30.88                           | BCLC(A/B/C/D):7/25/ 59/9                                                  | OS                 | 100 (31) | 74/26   | 8 |
| 2019 | Joongyoo Lee      | Korea           | Radiotherapy                             | SMI               | Male:49; Female:41                                 | LCSGJ (I/II/III/IVA/IVB):3/1                                              | OS                 | 156 (99) | 128/25  | 8 |

|      |                 |         |                                                |           |                                                         |                                       |                                 |           |        |   |
|------|-----------------|---------|------------------------------------------------|-----------|---------------------------------------------------------|---------------------------------------|---------------------------------|-----------|--------|---|
|      |                 |         |                                                |           |                                                         | 5/48/69/21                            |                                 |           |        |   |
| 2019 | Andreas Kroh    | Germany | liver resection                                | SMI       | Male, 43 for BMI < 25, 53 for BMI > 25; Female, 41      | Milan criteria (beyond/within): 58/12 | OS, postoperative complications | 70 (33)   | 49/21  | 7 |
| 2020 | Anton Faron     | Germany | TARE                                           | FFMA      | Male: 3582mm <sup>2</sup> ; Female: 2301mm <sup>2</sup> | BCLC(A/B/C):1/22/35                   | OS                              | 58 (29)   | 45/13  | 7 |
| 2020 | Tsung-Yi Cheng  | Taiwan  | After the treatment of sorafenib               | TPMT/BH   | 16.8                                                    | BCLC stage C                          | OS/PPS                          | 385 (249) | 302/83 | 8 |
| 2020 | Haruki Uojima   | Japan   | lenvatinib                                     | SMI       | Male:42; Female:38                                      | BCLC(B/C):49/51                       | OS, toxicity                    | 100 (59)  | 75/25  | 8 |
| 2020 | Kei Endo        | Japan   | lenvatinib                                     | SMI       | Male:42; Female:38                                      | BCLC(B/C):19/44                       | OS                              | 53 (22)   | 53/10  | 8 |
| 2020 | Kanghyug Choi   | Korea   | Resection/RFA/TACE/systemic therapy:8/38/187/3 | PMI       | Male:4.98; Female:1.17                                  | BCLC(0/A/B/C):43/95/43/57             | OS                              | 238 (135) | 193/45 | 8 |
| 2020 | Wen-Shuo Yeh    | Taiwan  | RFA                                            | PMI       | Male:4.24; Female:2.5                                   | BCLC stage 0 and A                    | OS                              | 136 (22)  | 78/58  | 8 |
| 2021 | Atsushi Hiraoka | Japan   | lenvatinib                                     | PSI       | Male:4.24; Female:2.5                                   | BCLC(A/B/C/D):2/52/96/1               | OS, toxicity                    | 151 (41)  | 116/35 | 8 |
| 2021 | Giulio Eugenio  | Italy   | TARE                                           | delta PMI | decrease in the delta PMI 1 month after                 | BCLC stage B and C                    | Tumor response                  | 86 (44)   | 65/21  | 8 |

|      |                   |       |                            |                          |                                                          |                                          |                                   |          |        |   |
|------|-------------------|-------|----------------------------|--------------------------|----------------------------------------------------------|------------------------------------------|-----------------------------------|----------|--------|---|
|      | Vallati           |       |                            |                          | TARE                                                     |                                          |                                   |          |        |   |
| 2021 | Nalee Kim         | Korea | nivolumab                  | SMI                      | Male:42;<br>Female:38                                    | BCLC stage C                             | OS, PFS, tumor response, toxicity | 102 (23) | 87/15  | 8 |
| 2021 | Mehmet Akce       | USA   | Anti-PD-1 Antibody         | SMI                      | Male:43;<br>Female:39                                    | BCLC(B/C):7/50                           | OS, PFS                           | 57 (28)  | 44/13  | 8 |
| 2021 | Ahmed Salman      | Egypt | RFA                        | SMI                      | Male, 43 for BMI < 25, 53 for BMI > 25;<br>Female, 41    | BCLC stage A                             | OS                                | 97 (42)  | 72/25  | 8 |
| 2021 | Hee Yoon Jang     | Korea | curative hepatic resection | PMI                      | Male:3.33;<br>Female:2.38                                | BCLC(0/A/B/C):<br>11/107/31/11           | OS, RFS                           | 160 (28) | 120/40 | 8 |
| 2021 | Sachiyo Yoshio    | Japan | surgical resection         | SMI                      | Male:42;<br>Female:38                                    | Stage (0/1/2/3/4): 25/<br>56/ 60/ 40/ 53 | OS, DFS                           | 234 (82) | 183/51 | 8 |
| 2021 | Chengyu Liao      | China | hepatectomy                | SMI                      | Male:40.86;<br>Female:30.71                              | BCLC(0/A/B/C):<br>24/274/16/140          | OS, RFS                           | 452 (82) | 386/66 | 8 |
| 2021 | Phillip L Guichet | USA   | TARE                       | FFMA                     | Male:31.97;<br>Female:28.95                              | BCLC(A/B/C):<br>16/29/30                 | OS                                | 82 (25)  | 65/17  | 7 |
| 2021 | Mitsuru Yanagaki  | Japan | Hepatic Resection          | area of the psoas muscle | Male:70 cm <sup>2</sup> ;<br>Female:46.1 cm <sup>2</sup> | TNM(I/II/III/IV):<br>20/75/35/8          | OS, DFS                           | 150 (66) | 118/32 | 8 |
| 2021 | Xiaoming          | China | TACE                       | cross-section            | Delta CSA muscle                                         | BCLC(A/B/C):<br>10/47/18                 | OS                                | 75 (46)  | 63/12  | 7 |

|      |                  |       |                                                        |                                           |                                                                                                     |                              |                             |         |       |   |
|------|------------------|-------|--------------------------------------------------------|-------------------------------------------|-----------------------------------------------------------------------------------------------------|------------------------------|-----------------------------|---------|-------|---|
|      | Zheng            |       |                                                        | area<br>(CSA) of<br>paraspinal<br>muscles |                                                                                                     |                              |                             |         |       |   |
| 2021 | Yusuke<br>Sugama | Japan | TACE/HAIC/s<br>orafenib/<br>lenvatinib:<br>14/38/17/18 | PMI                                       | TACE/HAIC:<br>4.98 for males<br>sorafenib/<br>lenvatinib: 5.66<br>for males and<br>4.61 for females | BCLC(A/B/C/D):29/39<br>/18/1 | OS                          | 87      | 61/26 | 7 |
| 2022 | Yifei<br>Tan     | China | LDLT                                                   | PMI                                       | 6.25                                                                                                | /                            | OS, RFS                     | 50      | Male  | 6 |
| 2022 | Dong<br>Dong     | China | lenvatinib                                             | SMI                                       | Male:42;<br>Female:38                                                                               | BCLC(B/C):12/28              | OS, PFS, tumor<br>response, | 40 (23) | 37/3  | 7 |

HCC: hepatocellular carcinoma; OS: overall survival; DFS: disease-free survival; RFS: recurrence-free survival; PFS: progression-free survival; TTP: time-to-progression; RFA: radiofrequency ablation; TACE: transarterial chemoembolization; TAI: transcatheter arterial infusion; TARE: transarterial radioembolization; BCLC: Barcelona Clinic Liver Cancer; LDLT: Living-Donor Liver Transplantation; BSC: Best supportive care; TPA: total psoas muscle area; FFM: fat-free mass; SMI: skeletal muscle index; PMI: psoas muscle index; FFMA: fat-free muscle area; TPMT/BH: the value of transverse psoas muscle thickness per body height; PSI: psoas muscle area index.

\*The group of sorafenib in this study was abbreviated as “2018-Saeki-S\*”, and the group of HAIC in this study was abbreviated as “2018-Saeki-H\*\*”.
